# Supplementary material for: Myeloid-Derived Suppressor Cells in Solid Tumors
Source: MDPI journal article supplement (doi:10.3390/cells11020310), 2022-01-17
Supplement: s1 [file s1]

**Supplementary Table S1. List of clinical trials with published results targeting on MDSCs in solid tumors**

| Author      | PMID     | Year | Tumor Type                            | No. of Patients                           | Treatments                                                                         | Stage           | Main results                                                                                                        |
|-------------|----------|------|---------------------------------------|-------------------------------------------|------------------------------------------------------------------------------------|-----------------|---------------------------------------------------------------------------------------------------------------------|
| Bruno.B     | 32451495 | 2020 | Pancreatic cancer                     | 59 patients                               | BL-8040 in combination with pembrolizumab and chemotherapy                         | COMBAT trial    | BL-8040 decreased MDSCs in PDAC                                                                                     |
| Andrea.B.A  | 32645282 | 2020 | Urothelial cancer                     | 68 patients                               | Cabozantinib                                                                       | phase 2 trial   | Cabozantinib lowered MDSCs in advanced urothelial carcinoma                                                         |
| Yaewon.Y    | 26787822 | 2016 | Solid tumors                          | 27 patients                               | Ex vivo-expanded and highly activated NK cells (MG4101)                            | phase 1 trial   | MG4101 reduced MDSCs in solid tumors                                                                                |
| Tian.Z      | 32757302 | 2020 | Urothelial cancer                     | 75 patients                               | Pembrolizumab and acalabrutinib                                                    | phase 2 trial   | BTK inhibition suppressed MDSCs and improved T-cell activation in metastatic urothelial cancer.                     |
| Andres.F    | 28050790 | 2017 | Solid tumors                          | 32 patients                               | DS-8273a                                                                           | phase 1 trial   | DS-8273a decreased MDSC in patients with advanced solid tumors                                                      |
| Haris.Z     | 31231785 | 2019 | Bladder cancer                        | 19 patients                               | Sunitinib                                                                          | phase 2 trial   | Sunitinib reversed MDSCs-mediated immunosuppression in patients with bladder cancer                                 |
| Howard.L.K  | 19915919 | 2010 | Melanoma                              | 50 patients                               | Oncolytic herpesvirus encoding GM-CSF (Oncovex(GM-CSF))                            | phase 2 trial   | GM-CSF downregulated MDSCs in patients with metastatic melanoma                                                     |
| Steven.E.F  | 20842055 | 2010 | Kidney Cancer and Melanoma            | 21 kidney cancers<br>19 melanoma patients | High-dose intravenous interleukin-2 (IL-2) therapy                                 | -               | Patients with high levels of MDSCs either before starting IL-2 therapy or after therapy had less favorable outcomes |
| A.J.Montero | 22138748 | 2012 | Breast cancer                         | 39 patients with 40 evaluable tumors      | NOV-002 in combination with doxorubicin and cyclophosphamide followed by docetaxel | phase 2 trial   | Patients with high MDSC levels could benefit from NOV-002 and standard chemotherapy in breast cancer                |
| Lisa.H.B    | 31014399 | 2019 | Melanoma                              | 30 patients                               | Antigen-engineered DC vaccine                                                      | Phase 1 trial   | Multiple antigen-engineered DC vaccines changed the frequency of MDSCs in patients with melanoma                    |
| Richard.P.T | 30121453 | 2018 | Advanced melanoma                     | 10 patients                               | Ipilimumab monotherapy or Ipilimumab plus all-trans retinoic acid (ATRA)           | phase 2 trial   | ATRA decreased the frequency of MDSCs, activated CD8+ T cells and matured HLA-DR(+) myeloid cells.                  |
| David.M.P   | 31600167 | 2019 | Glioblastoma                          | 11 patients                               | Capecitabine + bevacizumab                                                         | Phase 0/I trial | Capecitabine+bevacizumab reduced circulating MDSC levels                                                            |
| Donald.T.W  | 25320361 | 2015 | Head and neck squamous cell carcinoma | 35 patients                               | Tadalafil                                                                          | phase 2 trial   | Tadalafil lowered MDSCs in patients with HNSCC                                                                      |

**Supplementary Table S2. List of completed or recruiting clinical trials without results submitted targeting on MDSCs in solid tumors**

| Clinical trail number | Solid Tumor Type                                      | No. of Patients | Treatment                                               | Stage     | Status                 |
|-----------------------|-------------------------------------------------------|-----------------|---------------------------------------------------------|-----------|------------------------|
| NCT03525925           | Metastatic Solid Tumors                               | 15 patients     | Ibrutinib and Nivolumab                                 | Phase 1   | Active, not recruiting |
| NCT03673787           | Glioblastoma, Multiforme Prostate Cancer              | 87 patients     | Ipatasertib in Combination With Atezolizumab            | Phase 1/2 | Recruiting             |
| NCT02637531           | Advanced Solid Tumors                                 | 219 patients    | IPI-549                                                 | Phase 1   | Active, not recruiting |
| NCT02432963           | Adult Solid Neoplasm                                  | 19 patients     | P53MVA and Pembrolizumab                                | Phase 1   | Active, not recruiting |
| NCT04105335           | Advanced Solid Tumours                                | 108 patients    | MTL-CEBPA in Combination With a PD-1 Inhibitor          | Phase 1   | Recruiting             |
| NCT04001101           | MSI-H Solid Tumors                                    | 140 patients    | RT and Anti-PD-1                                        | Phase 2   | Recruiting             |
| NCT02922764           | Advanced Solid Malignancies and Lymphoma              | 135 patients    | RGX-104                                                 | Phase 1   | Recruiting             |
| NCT02453620           | Solid tumors                                          | 45 patients     | Entinostat, Nivolumab, and Ipilimumab                   | Phase 1   | Active, not recruiting |
| NCT02916745           | Lung Cancer                                           | 5 patients      | Photodynamic therapy-Photofrin                          | Phase 1   | Active, not recruiting |
| NCT02526017           | Advanced Solid Tumors                                 | 295 patients    | Cabiralizumab in Combination With Nivolumab             | Phase 1   | Completed              |
| NCT03961698           | Triple-Negative Breast Cancer or Renal Cell Carcinoma | 90 patients     | IPI-549 Combined With Front-line Treatments             | Phase 2   | Recruiting             |
| NCT04815720           | Squamous Cell Carcinoma of the Head and Neck          | 80 patients     | Pepinemab in Combination With Pembrolizumab             | Phase 1/2 | Recruiting             |
| NCT04757662           | Astrocytoma                                           | 16 patients     | Tadalafil                                               | Phase 2   | Recruiting             |
| NCT03161431           | Metastatic Melanoma                                   | 77 patients     | SX-682 in Combination With Pembrolizumab                | Phase 1   | Recruiting             |
| NCT04129255           | Neuroendocrine Tumors                                 | 34 patients     | Octreotide LAR                                          | Phase 2   | Completed              |
| NCT03486119           | Non-Small Cell Lung Cancer                            | 60 patients     | Nivolumab                                               | Phase 1/2 | Completed              |
| NCT02544880           | Head and Neck Squamous Cell Carcinoma                 | 16 patients     | Tadalafil and MUC1 Vaccine                              | Phase 1   | Completed              |
| NCT03300817           | Lung cancer                                           | 50 patients     | MUC1 Vaccine                                            | Phase 1   | Recruiting             |
| NCT02992912           | Metastatic Tumours                                    | 187 patients    | Atezolizumab With Stereotactic Ablative Radiotherapy    | Phase 2   | Recruiting             |
| NCT04352777           | Advanced ER+/HER2- Breast Cancer                      | 30 patients     | Endocrine Therapy and Abemaciclib                       | Phase 2   | Recruiting             |
| NCT01803152           | Children and Adults With Sarcoma                      | 19 patients     | Dendritic Cell Vaccine                                  | Phase 1   | Active, not recruiting |
| NCT02090101           | Metastatic Colorectal Cancer                          | 32 patients     | LV5FU2 Bevacizumab+Anakinra                             | Phase 2   | Completed              |
| NCT04796220           | Breast Cancer                                         | 48 patients     | Focused Ultrasound and Gemcitabine                      | Phase 1   | Not yet recruiting     |
| NCT02603003           | Non-small Cell Lung Cancer                            | 218 patients    | JinFuKang, Cisplatin and Pemetrexed                     | Phase 1   | Completed              |
| NCT04170556           | Hepatocellular Carcinoma                              | 78 patients     | Regorafenib and Nivolumab                               | Phase 1/2 | Recruiting             |
| NCT03245489           | Head and Neck Squamous Cell Carcinoma                 | 20 patients     | Pembrolizumab in Combination With Anti-platelet Therapy | Phase 1   | Recruiting             |
| NCT04361409           | Head and Neck Squamous Cell Carcinoma                 | 10 patients     | Rituximab Plus Chemotherapy                             | Phase 1   | Completed              |

|             |                                                         |               |                                                                                                     |           |                        |
|-------------|---------------------------------------------------------|---------------|-----------------------------------------------------------------------------------------------------|-----------|------------------------|
| NCT02830594 | Esophagus, Stomach, or Gastroesophageal Junction Cancer | 14 patients   | Pembrolizumab and Palliative Radiation Therapy                                                      | Phase 2   | Active, not recruiting |
| NCT03801304 | Non-small Cell Lung Cancer                              | 80 patients   | Vinorelbine With Metronomic Administration in Combination With Atezolizumab                         | Phase 2   | Active, not recruiting |
| NCT03854799 | Locally Advanced Rectal Cancer                          | 101 patients  | Avelumab and Capecitabine                                                                           | Phase 2   | Recruiting             |
| NCT02157051 | HER2-Negative Stage III-IV Breast Cancer                | 40 patients   | CD105/Yb-1/SOX2/CDH3/MDM2-polyepitope Plasmid DNA Vaccine                                           | Phase 1   | Recruiting             |
| NCT04028245 | Localized Clear Cell Renal Cell Carcinoma               | 14 patients   | Combination Spartalizumab and Canakinumab                                                           | Phase 1   | Recruiting             |
| NCT04919369 | Recurrent or Metastatic Non-Small Cell Lung Cancer      | 18 patients   | All-Trans Retinoic Acid (ATRA) and Atezolizumab                                                     | Phase 1   | Not yet recruiting     |
| NCT03964337 | High-risk prostate cancer                               | 33 patients   | Prostatectomy vs. Cabozantinib Followed by Prostatectomy                                            | Phase 2   | Recruiting             |
| NCT01413022 | Locally Advanced Pancreatic Adenocarcinoma              | 44 patients   | FOLFIRINOX Plus PF-04136309                                                                         | Phase 1   | Completed              |
| NCT03269526 | Pancreatic Cancer                                       | 22 patients   | EGFR BATs                                                                                           | Phase 1/2 | Recruiting             |
| NCT01953900 | Osteosarcoma Neuroblastoma                              | 26 patients   | iC9-GD2-CAR-VZV-CTLs                                                                                | Phase 1   | Active, not recruiting |
| NCT02275039 | Ovarian Epithelial Cancer                               | 12 patients   | p53MVA Vaccine and Gemcitabine Hydrochloride                                                        | Phase 1   | Completed              |
| NCT03203005 | Hepatocellular Carcinoma                                | 22 patients   | IMA970A Plus CV8102                                                                                 | Phase 1/2 | Completed              |
| NCT02479230 | Metastatic Breast Cancer                                | 18 patients   | Type I-Polarized Autologous Dendritic Cell Vaccine With Tumor Blood Vessel Antigen-Derived Peptides | Phase 1   | Completed              |
| NCT04068649 | Metastatic Malignant Neoplasm                           | 1500 patients | Single-Fraction SBRT Versus Standard Palliative Radiation Therapy                                   | Phase 2   | Recruiting             |
| NCT03410030 | Pancreatic Cancer                                       | 27 patients   | Ascorbic Acid (AA) + Nanoparticle Paclitaxel Protein Bound + Cisplatin + Gemcitabine                | Phase 1/2 | Active, not recruiting |
| NCT04011033 | Advanced HCC                                            | 144 patients  | Adoptive Transfer of iNKT Cells Combined With TACE                                                  | Phase 2/3 | Recruiting             |
| NCT01808820 | Malignant Glioma and Glioblastoma                       | 20 patients   | Dendritic Cell (DC) Vaccine                                                                         | Phase 1   | Active, not recruiting |
| NCT02961257 | Prostate Cancer Metastatic                              | 170 patients  | cabazitaxel, Prednisone, Granulocyte colony-stimulating factor (G-CSF)                              | Phase 3   | Recruiting             |
| NCT03618641 | Melanoma                                                | 34 patients   | CMP-001 in Combo With Nivolumab                                                                     | Phase 2   | Active, not recruiting |
| NCT04375956 | Ovarian, Primary Peritoneal, or Fallopian Tube Cancer   | 100 patients  | Pembrolizumab                                                                                       | Phase 2   | Not yet recruiting     |
| NCT04599140 | Colorectal Cancer                                       | 53 patients   | SX-682 and Nivolumab                                                                                | Phase 1/2 | Recruiting             |
| NCT04848519 | Recurrent or Metastatic Urothelial Cancer               | 25 patients   | Propranolol Hydrochloride and Pembrolizumab                                                         | Phase 2   | Recruiting             |
| NCT04323202 | Advanced Basal Cell Carcinoma                           | 15 patients   | Neoadjuvant-Adjuvant Pembrolizumab                                                                  | Phase 1   | Recruiting             |
| NCT03311308 | Advanced Melanoma                                       | 30 patients   | Pembrolizumab and Metformin Versus Pembrolizumab                                                    | Phase 1   | Recruiting             |
| NCT02917772 | Metastatic or Advanced Renal Cell Carcinoma             | 200 patients  | Nivolumab/Ipilimumab                                                                                | Phase 2   | Active, not recruiting |
| NCT04616248 | Breast Cancer                                           | 36 patients   | Radio-immunotherapy (CDX-301, Radiotherapy, CDX-1140 and Poly-ICLC)                                 | Phase 1   | Recruiting             |
| NCT03201458 | Metastatic Bile Duct Cancer                             | 76 patients   | Atezolizumab With or Without Cobimetinib                                                            | Phase 2   | Active, not recruiting |
| NCT04986852 | Metastatic Triple-Negative Breast Cancer                | 36 patients   | Olinvacimab With Pembrolizumab                                                                      | Phase 2   | Not yet recruiting     |

|             |                                                       |              |                                                                               |           |                        |
|-------------|-------------------------------------------------------|--------------|-------------------------------------------------------------------------------|-----------|------------------------|
| NCT04722575 | Melanoma                                              | 88 patients  | Combination or Sequence of Vemurafenib, Cobimetinib, and Atezolizumab         | Phase 2   | Recruiting             |
| NCT01684397 | Kidney Cancer                                         | 51 patients  | Pazopanib Hydrochloride and Bevacizumab                                       | Phase 1/2 | Recruiting             |
| NCT04612530 | Metastatic Pancreatic Cancer                          | 18 patients  | Irreversible Electroporation (IRE) + Nivolumab + CpG                          | Phase 1   | Recruiting             |
| NCT02718443 | Glioblastoma                                          | 14 patients  | VXM01                                                                         | Phase 1   | Completed              |
| NCT04079712 | Poorly Differentiated Neuroendocrine Tumors           | 30 patients  | Combination of XL184 (Cabozantinib), Nivolumab, and Ipilimumab                | Phase 2   | Recruiting             |
| NCT03113487 | Ovarian, Primary Peritoneal, or Fallopian Tube Cancer | 28 patients  | P53MVA and Pembrolizumab                                                      | Phase 2   | Recruiting             |
| NCT04274023 | Advanced Clear Cell Sarcoma                           | 16 patients  | TSR-042                                                                       | Phase 2   | Active, not recruiting |
| NCT04015700 | Unmethylated Glioblastoma                             | 12 patients  | Neoantigen-based Personalized DNA Vaccine                                     | Phase 1   | Recruiting             |
| NCT03200847 | Advanced Melanoma                                     | 26 patients  | Pembrolizumab and All-Trans Retinoic Acid Combination                         | Phase 1/2 | Active, not recruiting |
| NCT04539366 | Osteosarcoma and Neuroblastoma                        | 67 patients  | GD2-Targeted Modified T-cells (GD2CART)                                       | Phase 1   | Not yet recruiting     |
| NCT04835402 | Pancreas Cancer                                       | 16 patients  | Electroporation Potentiated Immunotherapy                                     | Phase 2   | Recruiting             |
| NCT02957968 | Breast Cancer                                         | 32 patients  | Neoadjuvant Pembrolizumab + Decitabine                                        | Phase 2   | Recruiting             |
| NCT03447678 | Non Small Cell Lung Cancer                            | 65 patients  | Pembrolizumab                                                                 | Phase 2   | Active, not recruiting |
| NCT02406183 | Melanoma                                              | 13 patients  | SBRT With Concurrent Ipilimumab                                               | Phase 1   | Completed              |
| NCT01720836 | Non-small Cell Lung Cancer                            | 30 patients  | Vaccine + PolyICLC                                                            | Phase 1/2 | Recruiting             |
| NCT02134925 | Advanced Colon Polyps                                 | 110 patients | MUC1 Peptide-Poly-ICLC Vaccine                                                | Phase 2   | Active, not recruiting |
| NCT03961698 | Triple-Negative Breast Cancer or Renal Cell Carcinoma | 90 patients  | IPI-549 Combined With Front-line                                              | Phase 2   | Recruiting             |
| NCT03680521 | Clear Cell Renal Cell Carcinoma                       | 25 patients  | Neoadjuvant Sitravatinib in Combination With Nivolumab                        | Phase 2   | Active, not recruiting |
| NCT02620865 | Pancreatic Cancer                                     | 2 patients   | Bispecific Antibody Armed Activated T-cells With Aldesleukin and Sargramostim | Phase 1/2 | Active, not recruiting |
| NCT03177187 | Metastatic Castration Resistant Prostate Cancer       | 86 patients  | AZD5069 and Enzalutamide                                                      | Phase 1/2 | Recruiting             |
| NCT04909034 | Non-small Cell Lung Cancer                            | 30 patients  | MS-20 In Combination With Pembrolizumab                                       | Phase 2   | Not yet recruiting     |
| NCT03415854 | Pancreatic Adenocarcinoma                             | 14 patients  | Paclitaxel Protein Bound Plus Cisplatin Plus Gemcitabine and Paricalcitol     | Phase 2   | Active, not recruiting |
| NCT03829111 | Advanced Kidney Cancer                                | 30 patients  | CBM588, Nivolumab, and Ipilimumab                                             | Phase 1   | Recruiting             |
| NCT02856815 | Hepatocellular Carcinoma                              | 78 patients  | Immune cell-LC                                                                | Phase 2   | Active, not recruiting |
| NCT02718430 | Colorectal Cancer With Liver Metastasis               | 6 patients   | VXM01                                                                         | Phase 1   | Completed              |
| NCT03089606 | Melanoma                                              | 27 patients  | Pembrolizumab and PET scan                                                    | Phase 2   | Active, not recruiting |
| NCT01935921 | Head and Neck Cancer                                  | 19 patients  | Ipilimumab, Cetuximab, and Intensity-Modulated Radiation Therapy              | Phase 1   | Active, not recruiting |
| NCT04931017 | Lung Cancer                                           | 50 patients  | Extended Release Metformin Hydrochloride                                      | Phase 2   | Not yet recruiting     |
| NCT04856176 | Non-small Cell Lung Cancer                            | 83 patients  | Sargramostim Plus Pembrolizumab With or Without Pemetrexed                    | Phase 2   | Not yet recruiting     |
